# Supplementary material for: Exchanging interlayer anions in NiFe-LDHs nanosphere enables superior battery-type storage for high-rate aqueous hybrid supercapacitors
Source: Royal Society of Chemistry journal article supplement (doi:10.1039/d4ta00299g), 2024-01-01
Supplement: d4ta00299g1.pdf [file d4ta00299g1.pdf]

## Supporting Information

### Exchanging Interlayer Anions in NiFe-LDHs Nanosphere Enables Superior Battery-Type Storage for High-Rate Aqueous Hybrid Supercapacitors

Harishchandra S. Nishad,<sup>a</sup> Vishal Kotha,<sup>b</sup> Pradip Sarwade,<sup>c</sup> Atul C. Chaskar,<sup>d</sup> Sagar Mane,<sup>e</sup> Jaewoong Lee,<sup>e</sup> Pravin S. Walke<sup>\*a</sup>

<sup>a</sup> National Centre for Nanosciences and Nanotechnology, University of Mumbai, Mumbai- India-400098.

<sup>b</sup> Department of Chemical Physics, Weizmann Institute of Science, Rehovot, Israel-7610001,

<sup>c</sup> Department of Physics, University of Mumbai, India-400098.

<sup>d</sup> Department of Chemistry, Institute of Chemical Technology, Mumbai, India-400019.

<sup>e</sup> Department of Fiber System Engineering, Yeungnam University, Gyeongsan, Gyeonbuk, South Korea, 38541.

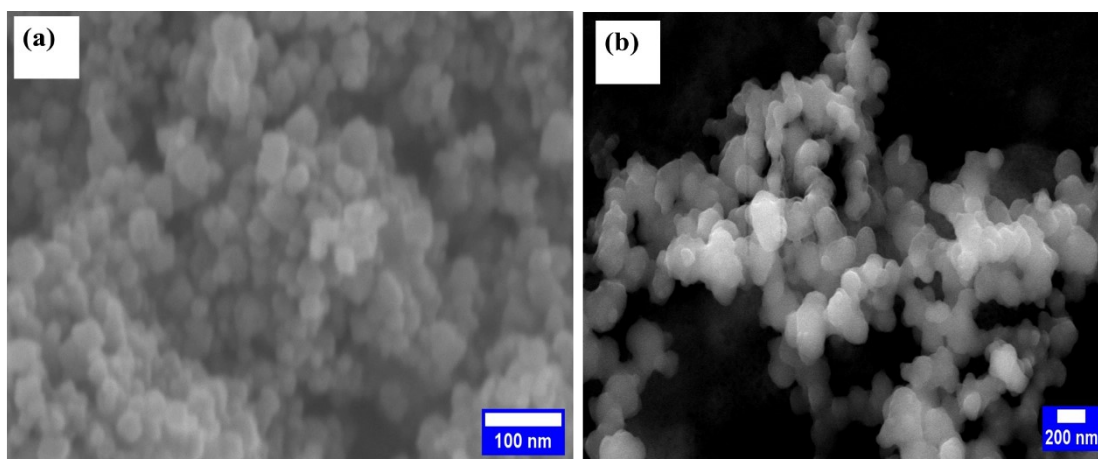

**Fig.S1** SEM image of NFC (a) and NFS (b)

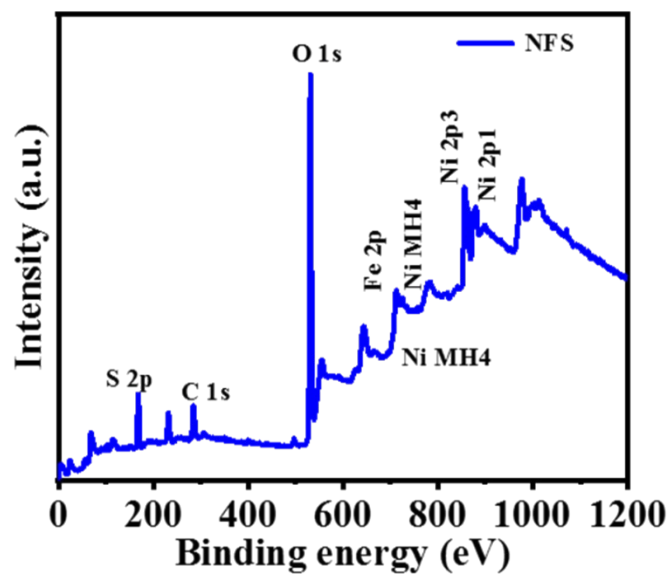

Fig.S2 XPS wide survey scan spectrum of NFS

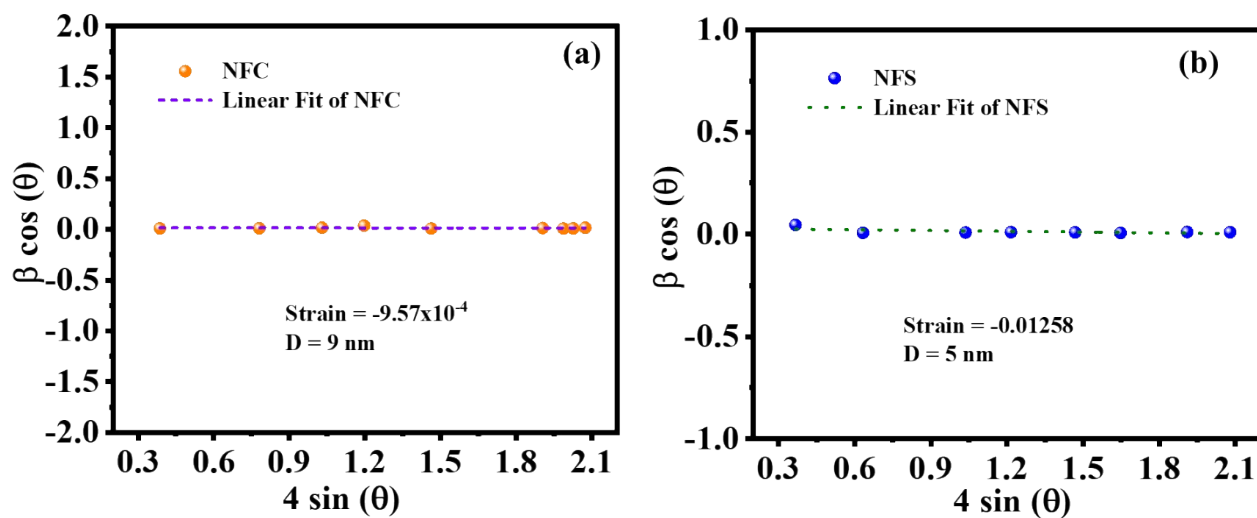

Fig.S3 W-H plot of NFC (a) and W-H plot of NFS (b)

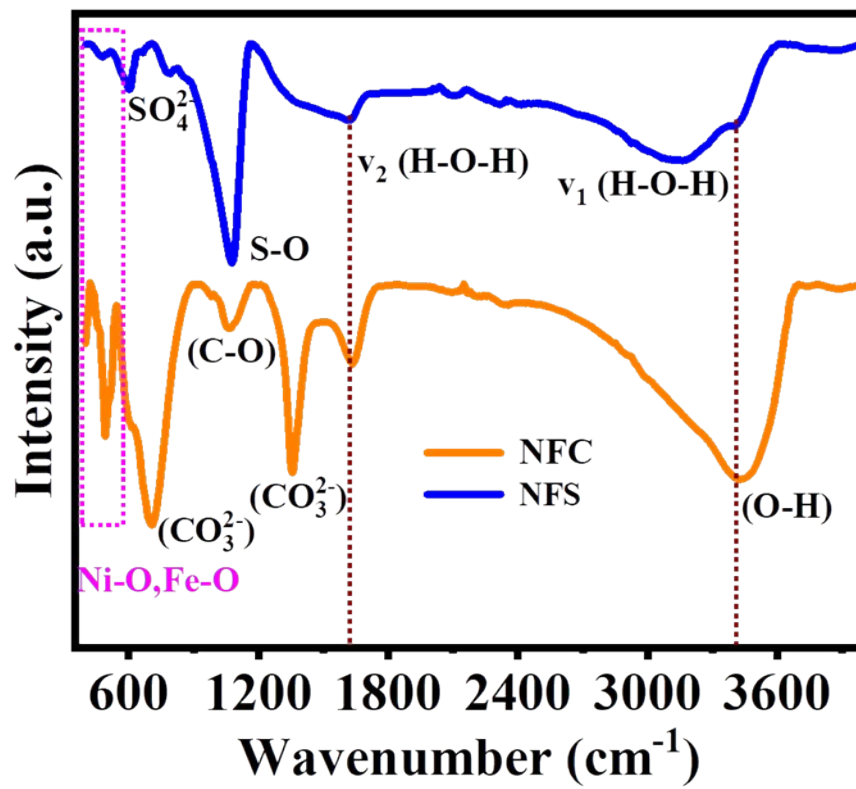

Fig. S4 FT-IR spectra of NFC and NFS.

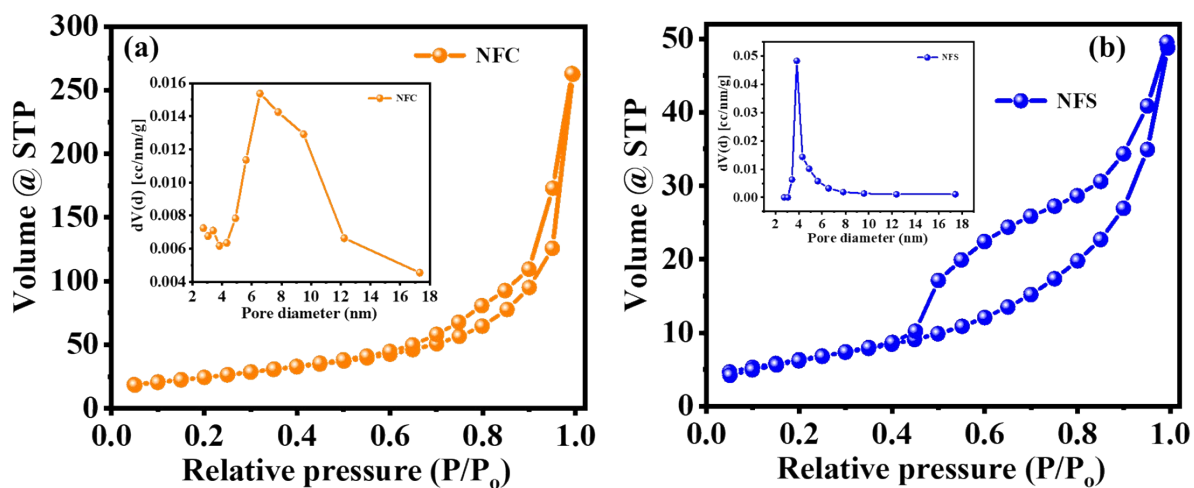

**Fig.5** Nitrogen adsorption–desorption isotherm and inset is pore diameter distribution of NFC (a) and NFS (b).

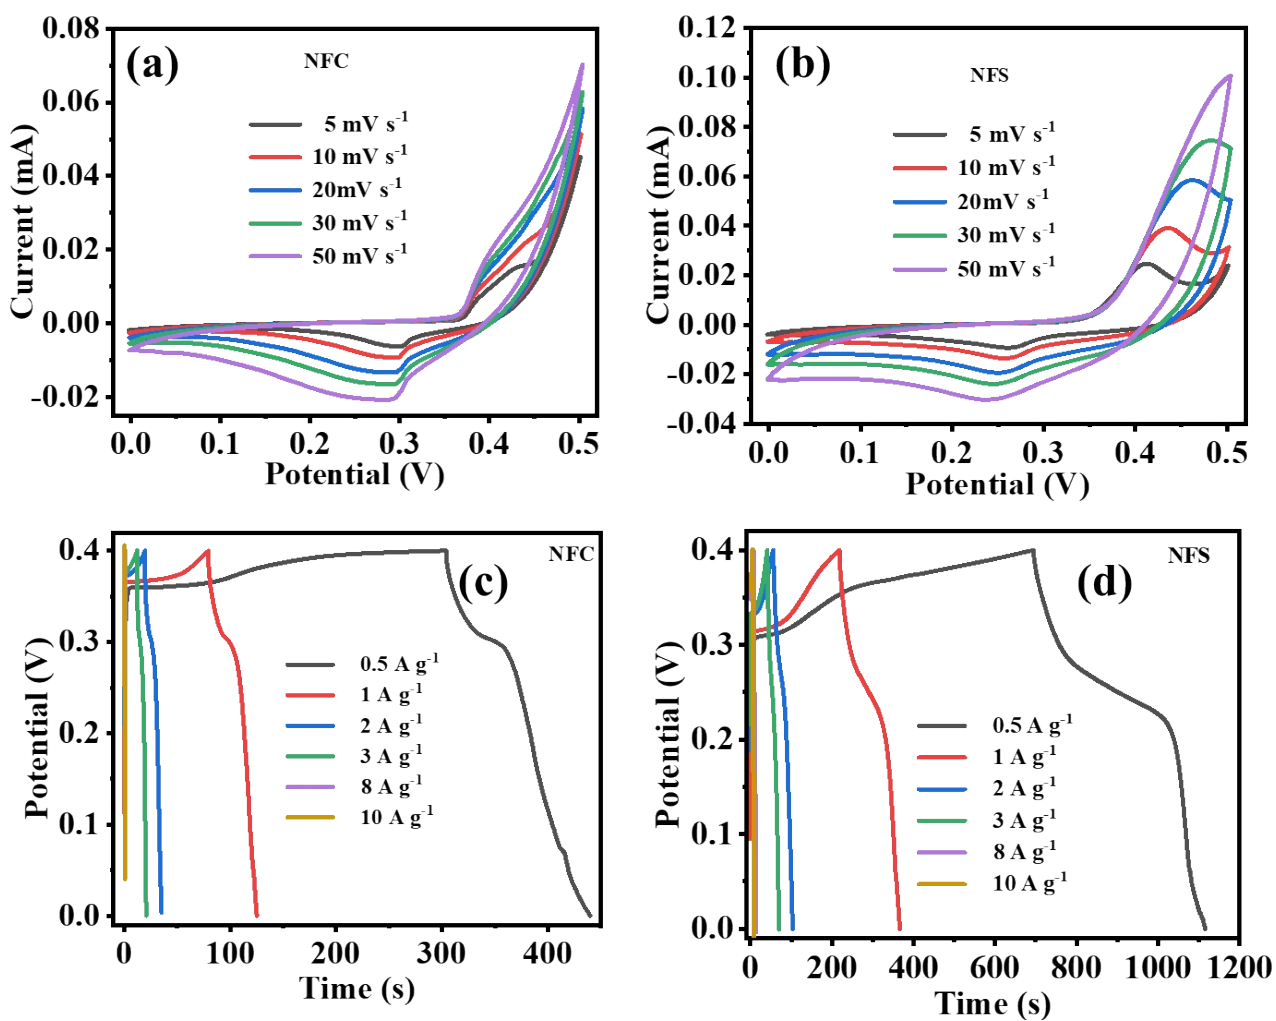

**Fig. S6** (a, b) CV curves of NFC and NFS at different scan rate, (c, d) GCD curves of NFC and NFS in 6 M KOH aqueous electrolyte respectively.
